# Supplementary material for: Heteroaggregation of water-in-oil droplets: the effects of relative internal solute concentrations and size
Source: Royal Society of Chemistry journal article supplement (doi:10.1039/c1sm06348k), 2011-01-01
Supplement: c1sm06348k.pdf [file c1sm06348k.pdf]

## SUPPLEMENTARY MATERIAL: An unusual droplet interaction

Michael O'Sullivan, Anya J. Howe, Stuart M. Clarke, and Alexander F. Routh\*  
Corresponding author: \*afr10@cam.ac.uk

July 17, 2011

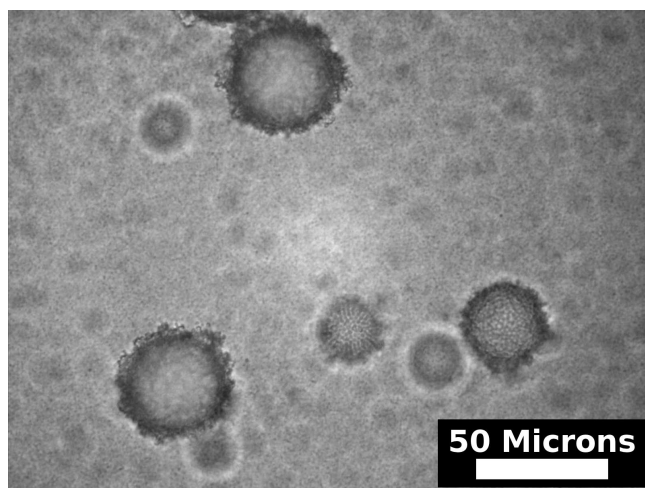

(a)

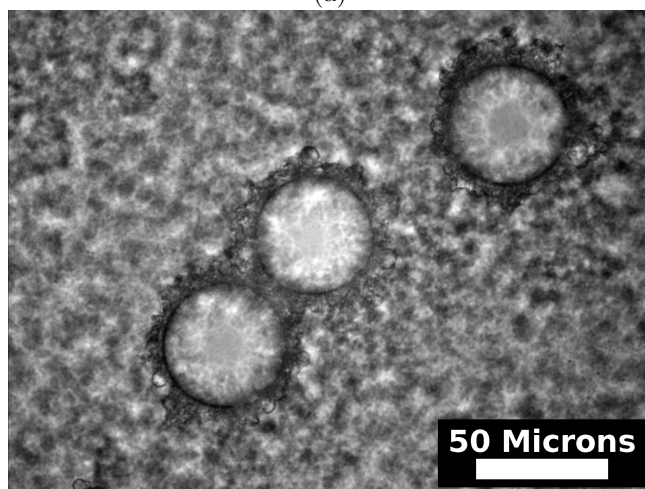

(b)

Figure 1: (a) Aggregates of small 1 mM KCl droplets with large pure water droplets: 4 hours after initial combination  
(b) Small 1 M KCl aggregated with large 10 mM droplets: 90 min after initial combination.
